# Supplementary material for: Distribution and antifungal susceptibility pattern of Candida species from mainland China: A systematic analysis
Source: PubMed Central journal article supplement (PMC9487756; doi:10.1080/21505594.2022.2123325), 2022-09-18
Supplement: KVIR_A_2123325_SM0291.pdf [file KVIR_A_2123325_SM0291.pdf]

**Supplementary file:**

Distribution and antifungal susceptibility pattern of *Candida* species from mainland China: A systematic analysis

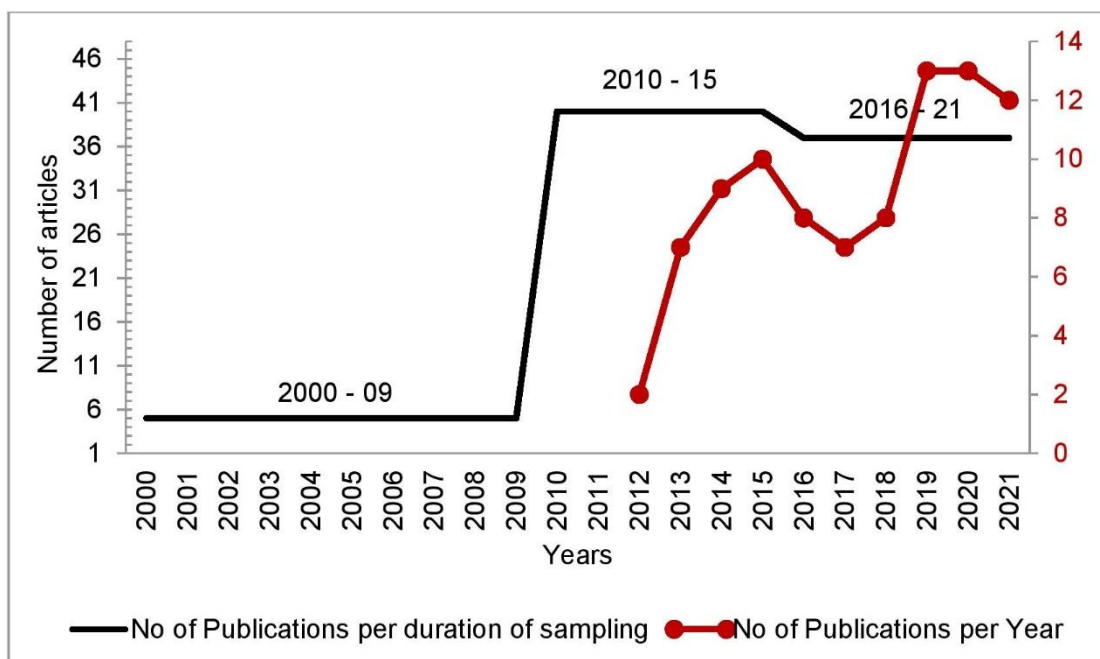

Figure S1 The number of articles based on sampling duration and publication per year



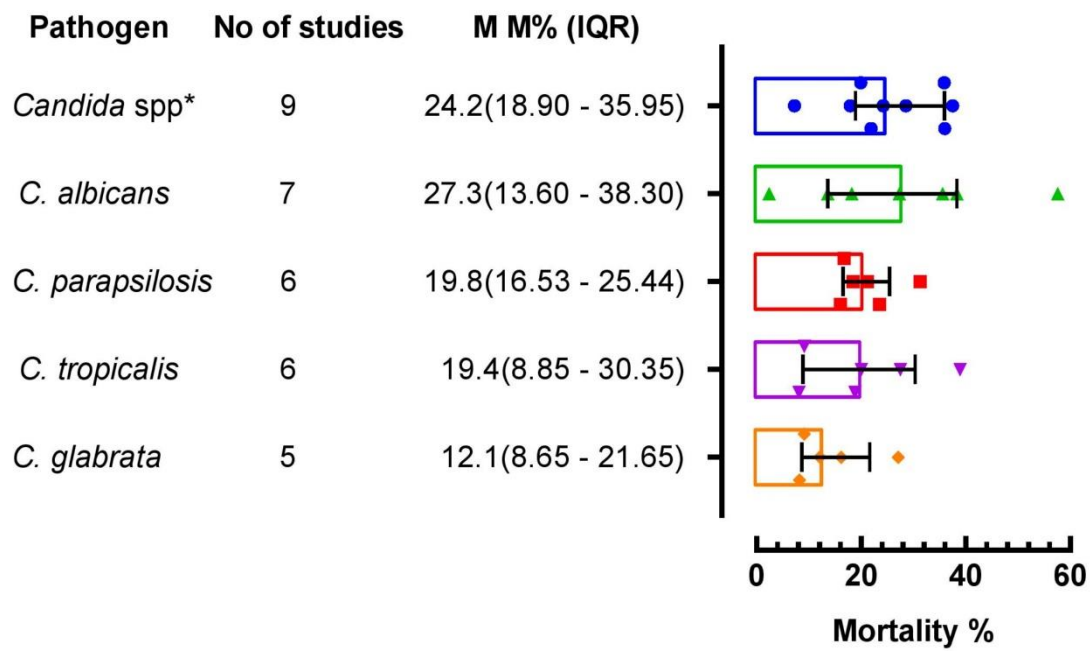

**Figure S3** The median mortality rate with interquartile range of *Candida* pathogens, \*= not specified the *Candida* pathogen type.

**Table S1** P-values of the susceptibilities rate of all antifungal drugs against *Candida* species included in current study.

| <i>C. albicans</i> |         |             | <i>C. glabrata</i> |         |             |
|--------------------|---------|-------------|--------------------|---------|-------------|
| Drugs              | P value | Significant | Drugs              | P value | Significant |
| Amphotericin B     | <0.0001 | Yes         | Amphotericin B     | <0.0001 | Yes         |
| Anidulafungin      | <0.0001 | Yes         | Anidulafungin      | <0.0001 | Yes         |
| Caspofungin        | <0.0001 | Yes         | Caspofungin        | <0.0001 | Yes         |
| Clotrimazole       | <0.0001 | Yes         | Clotrimazole       | 0.1158  | No          |
| Fluconazole        | <0.0001 | Yes         | Fluconazole        | <0.0001 | Yes         |
| 5-Flucytosine      | <0.0001 | Yes         | 5-Flucytosine      | <0.0001 | Yes         |
| Itraconazole       | <0.0001 | Yes         | Itraconazole       | <0.0001 | Yes         |
| Ketoconazole       | 0.0066  | Yes         | Ketoconazole       | 0.0131  | Yes         |
| Micafungin         | <0.0001 | Yes         | Micafungin         | <0.0001 | Yes         |
| Miconazole         | 0.0016  | Yes         | Miconazole         | 0.042   | Yes         |
| Nystatin           | <0.0001 | Yes         | Nystatin           | <0.0001 | Yes         |
| Posaconazole       | <0.0001 | Yes         | Posaconazole       | <0.0001 | Yes         |
| Voriconazole       | <0.0001 | Yes         | Voriconazole       | <0.0001 | Yes         |
| Terbinafine        | 0.4164  | No          |                    |         |             |

  

| <i>C. tropicalis</i> |         |             | <i>C. parapsilosis</i> |         |             |
|----------------------|---------|-------------|------------------------|---------|-------------|
| Drugs                | P value | Significant | Drugs                  | P value | Significant |
| Amphotericin B       | <0.0001 | Yes         | Amphotericin B         | <0.0001 | Yes         |
| Anidulafungin        | <0.0001 | Yes         | Anidulafungin          | <0.0001 | Yes         |
| Caspofungin          | <0.0001 | Yes         | Caspofungin            | <0.0001 | Yes         |
| Clotrimazole         | 0.3308  | No          | Clotrimazole           | 0.0003  | Yes         |
| Fluconazole          | <0.0001 | Yes         | Fluconazole            | <0.0001 | Yes         |
| 5-Flucytosine        | <0.0001 | Yes         | 5-Flucytosine          | <0.0001 | Yes         |
| Itraconazole         | <0.0001 | Yes         | Itraconazole           | <0.0001 | Yes         |
| Ketoconazole         | 0.0574  | No          | Micafungin             | <0.0001 | Yes         |
| Micafungin           | <0.0001 | Yes         | Posaconazole           | <0.0001 | Yes         |
| Miconazole           | 0.1065  | No          | Voriconazole           | <0.0001 | Yes         |
| Nystatin             | <0.0001 | Yes         |                        |         |             |
| Posaconazole         | 0.0003  | Yes         |                        |         |             |
| Voriconazole         | <0.0001 | Yes         |                        |         |             |

  

| <i>C. krusei</i> |         |             | <i>C. guilliermondii</i> |         |             |
|------------------|---------|-------------|--------------------------|---------|-------------|
| Drugs            | P value | Significant | Drugs                    | P value | Significant |
| Amphotericin B   | <0.0001 | Yes         | Anidulafungin            | 0.0134  | Yes         |
| Anidulafungin    | <0.0001 | Yes         | Caspofungin              | 0.0117  | Yes         |
| Caspofungin      | <0.0001 | Yes         | Fluconazole              | 0.0003  | Yes         |
| 5-Flucytosine    | <0.0001 | Yes         | 5-Flucytosine            | 0.0155  | Yes         |
| Itraconazole     | <0.0001 | Yes         | Itraconazole             | 0.0013  | Yes         |
| Micafungin       | <0.0001 | Yes         | Micafungin               | 0.0013  | Yes         |
| Posaconazole     | <0.0001 | Yes         | Posaconazole             | 0.0267  | Yes         |
| Voriconazole     | <0.0001 | Yes         | Voriconazole             | <0.0001 | Yes         |

  

| <i>C. auris</i> |         |             | <i>C. pilliculosa</i> |         |             |
|-----------------|---------|-------------|-----------------------|---------|-------------|
| Drugs           | P value | Significant | Drugs                 | P value | Significant |
| Itraconazole    | 0.0214  | Yes         | Fluconazole           | 0.0344  | Yes         |

|              |        |    |              |       |     |
|--------------|--------|----|--------------|-------|-----|
| Voriconazole | 0.4114 | No | Voriconazole | 0.022 | Yes |
|--------------|--------|----|--------------|-------|-----|

*C. lusitanae*

| Drugs          | P value | Significant |
|----------------|---------|-------------|
| Amphotericin B | 0.0177  | Yes         |
| Fluconazole    | 0.0007  | Yes         |
| Itraconazole   | 0.0363  | Yes         |
| Micafungin     | 0.0265  | Yes         |

**Table S2** Median susceptibility plus 95% confidence interval (MS (95%CI) of antifungal drugs against *Candida* species obtained by different susceptibility testing methods.

| Drug                  | <i>C. albicans</i>                    | <i>C. glabrata</i>                    | <i>C. tropicalis</i>                   | <i>C. parapsilosis</i>                | <i>C. krusei</i>                     |
|-----------------------|---------------------------------------|---------------------------------------|----------------------------------------|---------------------------------------|--------------------------------------|
| AST method            | MS (95% CI)                           | MS (95% CI)                           | MS (95% CI)                            | MS (95% CI)                           | MS (95% CI)                          |
|                       | Tested isolates                       | Tested isolates                       | Tested isolates                        | Tested isolates                       | Tested isolates                      |
| <b>Amphotericin B</b> |                                       |                                       |                                        |                                       |                                      |
| ATB Fungus 3 kit      | 100 (99.3 - 100)<br><i>n</i> = 1945   | 100 (100 - 100)<br><i>n</i> = 575     | 100 (100 - 100)<br><i>n</i> = 505      | 100 (96.50 - 100)<br><i>n</i> = 545   | 100 (100 - 100)<br><i>n</i> = 23     |
| BMD                   | 100 (98.9 - 100)<br>5929              | 100 (99.8 - 100)<br><i>n</i> = 1426   | 100 (99.9 - 100)<br><i>n</i> = 1324    | 100 (99.90 - 100)<br><i>n</i> = 1472  | 100 (96.6 - 100)<br><i>n</i> = 178   |
| Agar Diffusion        | 97.2 (95.5-98.8)<br><i>n</i> = 236    | 90.9 (84.6 - 97.1)<br><i>n</i> = 81   | 92.9 (92.30 - 99.8)<br><i>n</i> = 3769 | -                                     | -                                    |
| Sensititre YeastOne   | 100 (97.5 - 100)<br><i>n</i> = 446    | 100 (97.4 - 100)<br><i>n</i> = 774    | 100 (98.2 - 100)<br><i>n</i> = 4792    | 100 (95.95 - 100)<br><i>n</i> = 1775  | 100 (100 - 100)<br><i>n</i> = 52     |
| <b>5-Flucytosine</b>  |                                       |                                       |                                        |                                       |                                      |
| ATB Fungus 3 kit      | 97.6 (95.5 - 98.5)<br><i>n</i> = 1564 | 100 (94.6 - 100)<br><i>n</i> = 433    | 98.5 (94.6 - 100)<br><i>n</i> = 306    | 100 (98.80 - 100)<br><i>n</i> = 317   | 86.37 (72.73 -100)<br><i>n</i> = 23  |
| BMD                   | 99.2 (97.1-100)<br>4394               | 99.50 (98.9 - 100)<br>1130            | 100 (98.8 - 100)<br><i>n</i> = 1276    | 100 (93.10 - 100)<br><i>n</i> = 1460  | 97.40 (80 - 100)<br><i>n</i> = 146   |
| Agar Diffusion        | 86.65 (83.3 - 90)<br><i>n</i> = 236   | 60.9 (30.7 - 91.2)<br><i>n</i> = 81   | 89.93 (89.7 - 99)<br><i>n</i> = 3769   | -                                     | -                                    |
| Sensititre YeastOne   | 98.1 (82.5-98.6)<br><i>n</i> = 446    | 98.10 (78.6 - 100)<br><i>n</i> = 774  | 99 (98.2 - 100)<br><i>n</i> = 4285     | 93.3 (84.62 - 9.2)<br><i>n</i> = 891  | 100 (100 - 100)<br><i>n</i> = 52     |
| <b>Fluconazole</b>    |                                       |                                       |                                        |                                       |                                      |
| ATB Fungus 3 kit      | 93 (87.5 - 96.1)<br><i>n</i> = 2563   | 79.85 (20 - 88.80)<br><i>n</i> = 595  | 70.3 (60 - 88.8)<br><i>n</i> = 576     | 91.45 (87.8 - 100)<br>562             | -                                    |
| BMD                   | 89.6 (63.3- 95.9)<br><i>n</i> = 9008  | 90.60 (0 - 100)<br><i>n</i> = 1132    | 78.9 (63.5 - 89.3)<br><i>n</i> = 2468  | 93.95 (80 - 100)<br><i>n</i> = 1514   | -                                    |
| Agar Diffusion        | 83.9 (72.6- 99.5)<br><i>n</i> = 9330  | 32.90 (4.3 - 81.3)<br><i>n</i> = 1789 | 81.7 (31.6 - 94.3)<br><i>n</i> = 5491  | 84.9 (57.7 - 98.6)<br><i>n</i> = 2035 | -                                    |
| Sensititre YeastOne   | 95 (55 - 99.30)<br><i>n</i> = 584     | 79.70 (0 - 92.86)<br><i>n</i> = 774   | 77.35 (45.5 - 88.4)<br><i>n</i> = 4840 | 94.5 (53.8 - 97.7)<br><i>n</i> = 1856 | -                                    |
| <b>Itraconazole</b>   |                                       |                                       |                                        |                                       |                                      |
| ATB Fungus 3 kit      | 88.1 (82.8- 96.3)<br><i>n</i> = 2326  | 72.6 (30.8 - 93.2)<br><i>n</i> = 556  | 63.9 (42.6 - 90.4)<br><i>n</i> = 517   | 97.2 (87.2 - 100)<br><i>n</i> = 562   | 60.6 (54.54 - 66.6)<br><i>n</i> = 23 |
| BMD                   | 88.3 (48.9 - 95.8)<br><i>n</i> = 5123 | 96.6 (24.20 - 100)<br><i>n</i> = 1159 | 81.90 (58.6 - 97)<br><i>n</i> = 1846   | 99.4 (50 -100)<br><i>n</i> = 1472     | 96.60 (10 - 100)<br><i>n</i> = 178   |
| Agar Diffusion        | 90.6 (46.5- 93.6)<br><i>n</i> = 4792  | 35.2 (8.1 - 90.6)<br><i>n</i> = 804   | 86.5 (65.1 - 90.2)<br><i>n</i> = 3761  | 97.5 (96.2 - 100)<br><i>n</i> = 124   | 8.35 (0 - 16.70)<br><i>n</i> = 36    |
| Sensititre YeastOne   | 94.2 (6 - 99.3)<br><i>n</i> = 446     | 92.3 (78.6 - 93.2)<br><i>n</i> = 774  | 89.1 (78.1 - 100)<br><i>n</i> = 4792   | 100 (76.9 - 100)<br><i>n</i> = 1775   | 100 (100 - 100)<br><i>n</i> = 52     |
| <b>Voriconazole</b>   |                                       |                                       |                                        |                                       |                                      |
| ATB Fungus 3 kit      | 95.3 (88.5 - 97.9)<br><i>n</i> = 2438 | 94.60 (89.7 - 100)<br><i>n</i> = 506  | 73 (61.10 - 9.40)<br><i>n</i> = 549    | 97.45 (95.7 - 100)<br><i>n</i> = 631  | 78.41 (75 - 81.82)<br><i>n</i> = 23  |
| BMD                   | 96.3 (51.2- 98.3)<br><i>n</i> = 5181  | 86.2 (58.4 - 95.3)<br><i>n</i> = 1159 | 83.96 (49.2 - 92.9)<br>2407            | 100 (92 - 100)<br><i>n</i> = 1514     | 93.40 (80 - 100)<br><i>n</i> = 178   |
| Agar Diffusion        | 99.3 (99.2 - 100)<br><i>n</i> = 4515  | 85.2 (73.3 - 92.3)<br><i>n</i> = 991  | 91.30 (79.7 -94.30)<br><i>n</i> = 5393 | 100 (97.50 - 100)<br>1933             | -                                    |
| Sensititre YeastOne   | 95.9 (9 - 96.9)<br><i>n</i> = 584     | 71.8 (36.50 - 100)<br><i>n</i> = 774  | 79.30 (42.50 - 100)<br><i>n</i> = 4818 | 95.90 (99.2 - 100)<br><i>n</i> = 1856 | 84.85 (69.70 - 100)<br><i>n</i> = 52 |
